# Supplementary material for: Therapeutic effects of astragaloside IV and Astragalus spinosus saponins against bisphenol A-induced neurotoxicity and DNA damage in rats
Source: PeerJ. 2021 Aug 9;9:e11930. doi: 10.7717/peerj.11930 (PMC8359804; doi:10.7717/peerj.11930)
Supplement: Supplemental Information 1 — All measurements performed in the brain regions of individual rats in all groups during the work. [file peerj-09-11930-s001.xlsx]

## Sheet: Protein content
	Total protein content (mg/g tissue)
	Control			BPA			BPA + Astragaloside IV			BPA + Astragalus spinosus saponin
No. of rats	Prefrontal cortex	Hippocampus	Striatum	Prefrontal cortex	Hippocampus	Striatum	Prefrontal cortex	Hippocampus	Striatum	Prefrontal cortex	Hippocampus	Striatum
1	54.27	38.8	59.98	44.69	35.11	34.66	44.38	40.06	46.68	33.05	42.73	40.23
2	64.81	40.33	47.72	35.9	35.01	28.68	57.85	28.87	50.72	40.76	26.7	39.07
3	44.7	30.97	48.56	32.4	29.32	49.67	41.48	43.08	42.06	38.34	43.7	51.73
4	63.39	34.08	69.17	35.01	33.53	46.98	47.16	41.45	30	39.84	34	53.3
5	75.66	37.67	71.9	41.57	25.78	51.73	43.06	33.05	33.85	69.27	36.78	46.08
6	86.05	36.37	53.3	44.25	28	41	40.69	33.21	47.51	44.25	36.78	46.08
7	64.81	36.37	48.47	41.57	31.12	42.12	47.89	41.44	57.54	44.25	36.78	46.08
X	64.8129	36.37	57.0143	39.3414	31.1243	42.12	46.0729	37.3086	44.0514	44.2514	36.7814	46.0814

## Sheet: Nitric oxide concentration
	Nitric oxide concentration (µmol/mg protein)
	Control			BPA			BPA + Astragaloside IV			BPA + Astragalus spinosus saponin
No. of rats	Prefrontal cortex	Hippocampus	Striatum	Prefrontal cortex	Hippocampus	Striatum	Prefrontal cortex	Hippocampus	Striatum	Prefrontal cortex	Hippocampus	Striatum
1	0.25	0.34	0.28	0.29	0.68	0.48	0.26	0.24	0.31	0.24	0.27	0.33
2	0.24	0.24	0.24	0.3	0.56	0.34	0.25	0.36	0.29	0.27	0.18	0.33
3	0.25	0.29	0.29	0.31	0.56	0.37	0.26	0.38	0.23	0.26	0.17	0.25
4	0.24	0.28	0.22	0.31	0.65	0.31	0.25	0.38	0.22	0.29	0.33	0.23
5	0.25	0.3	0.24	0.31	0.53	0.46	0.23	0.47	0.29	0.3	0.31	0.31
6	0.23	0.33	0.21	0.31	0.48	0.42	0.24	0.2	0.26	0.23	0.33	0.22
7	0.24	0.27	0.2	0.36	0.95	0.53	0.27	0.32	0.26	0.25	0.3	0.28
X	0.242857	0.292857	0.24	0.312857	0.63	0.415714	0.251429	0.335714	0.265714	0.262857	0.27	0.278571

## Sheet: Glutaminase activity
	Glutaminase Activity (mM ammonia/min./mg protein)
	Control			BPA			BPA + Astragaloside IV			BPA + Astragalus spinosus saponin
No. of rats	Prefrontal cortex	Hippocampus	Striatum	Prefrontal cortex	Hippocampus	Striatum	Prefrontal cortex	Hippocampus	Striatum	Prefrontal cortex	Hippocampus	Striatum
1	316	294	1252	257	220	288	264	355	1961	354	284	1087
2	282	277	1263	262	240	509	261	307	1959	303	251	1037
3	561	251	1164	236	237	418	278	297	1513	375	242	1043
4	456	241	1226	313	238	405	260	300	1281	318	235	1050
5	398	245	1229	358	203	405	264	309	1070	323	257	1102
6	374	245	1227	285	266	405	438	340	1557	335	254	1064
7	336	262	1227	285	240	405	294	280	1557	335	254	1064
X	389	259.286	1226.86	285.143	234.857	405	294.143	312.571	1556.86	334.714	253.857	1063.86

## Sheet: Glutamine synthetase activity
	Glutamine synthetase Activity (mM Ɣ-glutamyl hydroxamate/min./mg protein)
	Control			BPA			BPA + Astragaloside IV			BPA + Astragalus spinosus saponin
No. of rats	Prefrontal cortex	Hippocampus	Striatum	Prefrontal cortex	Hippocampus	Striatum	Prefrontal cortex	Hippocampus	Striatum	Prefrontal cortex	Hippocampus	Striatum
1	19.76	25.42	37.89	19.26	18.64	33.29	21.57	24.37	28.18	21.31	19.11	25.09
2	22.24	23.53	42.93	15.79	15.79	29.65	19.15	21.77	37	17.09	19.11	31.55
3	26.82	23.05	39.97	18.74	18.63	30.92	21.01	23.72	29	20.27	24.31	27.37
4	22.05	22.69	32.63	20.48	23.78	31.77	25.2	22.85	31.18	16.64	38.14	26.61
5	21.86	19.62	34.6	23.86	9.83	28.46	20.83	24.01	35.73	17.64	17	47.33
6	19.76	24.09	37.56	20.13	18.64	23.04	21.48	23.72	35.55	18.59	23.53	31.59
7	22.05	28.07	38	14.67	18.64	24.23	19.71	28.06	35	18.59	23.53	31.59
X	22.0771	23.7814	37.6543	18.99	17.7071	28.7657	21.2786	24.0714	33.0914	18.59	23.5329	31.59

## Sheet: Glutamate concentration  
	Glutamate concentration (µmole/g tissue)
	Control			BPA			BPA + Astragaloside IV			BPA + Astragalus spinosus saponin
No. of rats	Prefrontal cortex	Hippocampus	Striatum	Prefrontal cortex	Hippocampus	Striatum	Prefrontal cortex	Hippocampus	Striatum	Prefrontal cortex	Hippocampus	Striatum
1	6.532	13.362	10.855	6.0982	13.372	11.7039	6.041	16.3409	13.657	3.599	11.462	12.655
2	5.844	12.148	11.261	7.574	12.25	10.4724	4.7931	16.306	12.2189	3.6735	10.0897	12.412
3	3.6096	10.569	14.1335	6.725	15.592	13.8933	4.035	11.068	10.874	4.102	10.841	13.375
4	5.196	6.5592	13.1403	7.9005	13.733	11.1935	5.19	11.179	11.9023	3.9784	8.1004	14.3715
5	3.719	9.073	12.2044	5.313	14.194	8.6598	6.9059	12.861	12.035	4.556	10.12	9.8036
6	4.98	10.342	16.4193	5.187	18.237	14.6541	6.1175	9.185	17.1368	3.98	10.12	12.52
7	4.98	10.342	20.0095	6.466	14.563	11.763	5.8755	10.396	14.112	3.98	10.12	12.52
X	4.98009	10.3422	14.0033	6.46624	14.563	11.7629	5.56543	12.4766	13.1337	3.98127	10.1219	12.5224

## Sheet: Glutamine concentration  
	Glutamine concentration (µmole/g tissue)
	Control			BPA			BPA + Astragaloside IV			BPA + Astragalus spinosus saponin
No. of rats	Prefrontal cortex	Hippocampus	Striatum	Prefrontal cortex	Hippocampus	Striatum	Prefrontal cortex	Hippocampus	Striatum	Prefrontal cortex	Hippocampus	Striatum
1	5.2308	9.6355	3.7947	3.079	5.831	2.663	3.498	5.0374	5.1242	3.632	7.379	6.039
2	3.1417	13.41	4.28991	2.795	5.322	2.6203	2.789	7.4903	3.6498	5.141	6.109	5.2626
3	6.1171	10.872	3.809	2.365	3.3226	1.976	2.352	4.667	4.484	3.5913	4.666	4.595
4	3.579	10.2965	3.0613	2.4392	3.3226	2.024	2.3945	6.2791	3.4455	3.854	3.839	3.3046
5	4.9898	12.619	6.2107	2.67	4.45	2.32	2.7184	4.3419	5.356	2.5204	6.526	2.9431
6	3.708	8.158	5.3774	2.67	4.45	2.32	2.75	5.0374	6.7166	3.75	5.641	4.43
7	4.461	9.188	4.424	2.67	4.45	2.32	2.75	5.476	4.8	3.75	5.693	4.43
X	4.46106	10.597	4.42386	2.66974	4.44974	2.32047	2.75027	5.47559	4.79659	3.74839	5.69329	4.42919

## Sheet: BDNF
	BDNF concentration (ng/ g tissue)
	Control			BPA			BPA + ASIV			BPA + A. spinosus saponin
No. of rats	Prefrontal cortex	Hippocampus	Striatum	Prefrontal cortex	Hippocampus	Striatum	Prefrontal cortex	Hippocampus	Striatum	Prefrontal cortex	Hippocampus	Striatum
1	0.84	0.835	1.43	1.3	0.79	0.72	1.06	1.2	1.03	1.235	0.995	1.42
2	1.22	0.925	1.135	1.335	0.985	1.225	1.135	1.295	1.095	1.205	1.24	1.025
3	1.165	0.985	1.24	1.615	0.625	0.805	0.9	1.255	0.875	1.375	1.545	1.36
4	1.57	1.045	1.135	1.185	0.81	1.185	1.46	1.43	0.835	1.065	1.375	2.085
5	1.085	1.295	0.855	1.32	0.8	0.985	1.46	0.965	0.945	0.85	1.1	1.473
6	1.175	1.045	1.16	1.35	0.8	0.985	1.205	1.43	1.32	1.145	1.251	1.473
X	1.17583	1.02167	1.15917	1.35083	0.801667	0.984167	1.20333	1.2625	1.01667	1.14583	1.251	1.47267

## Sheet: NR2A 
	Control			BPA			BPA + ASIV			BPA + A. spinosus saponin
No. of rats	Prefrontal cortex	Hippocampus	Striatum	Prefrontal cortex	Hippocampus	Striatum	Prefrontal cortex	Hippocampus	Striatum	Prefrontal cortex	Hippocampus	Striatum
1	1	1	1	2.7207	1.7925	0.052	1.12785	1.5053	2.557	1.8661	2.3675	1.6994
2	1	1	1	3.9834	2.7895	0.0474	1.4439	1.4368	1.4114	1.3835	1.6625	1.3426
3	1	1	1	3.0716	2.5527	0.07229	1.5369	2.2861	2.6027	1.815	1.16743	2.0491
4	1	1	1	2.988	3.9504	0.0427	1.6818	2.2703	2.7267	1.7231	2.0468	1.12896
5	1	1	1	3.191	3.057	0.0454	1.1057	1.733	2.6891	1.4389	1.811	1.6818
6	1	1	1	3.192	2.828	0.05	1.0373	1.3674	2.1585	1.645	1.81	1.8298
X	1	1	1	3.19112	2.82835	0.0516317	1.32224	1.76648	2.35757	1.64527	1.81087	1.62194

## Sheet: NR2B new
	Control			BPA			BPA + ASIV			BPA + A. spinosus saponin
No. of rats	Prefrontal cortex	Hippocampus	Striatum	Prefrontal cortex	Hippocampus	Striatum	Prefrontal cortex	Hippocampus	Striatum	Prefrontal cortex	Hippocampus	Striatum
1	1	1	1	0.156	0.1456	1.1173	1.6006	0.54715	0.4475	1.22264	0.6029	0.92019
2	1	1	1	0.2269	0.1649	1.2746	1.6133	0.57104	0.51763	1.2142	0.7544	0.7846
3	1	1	1	0.2192	0.1937	1.8176	1.4728	0.44751	0.55095	1.4641	0.8706	0.8645
4	1	1	1	0.2123	0.18175	1.5583	2.3784	0.5296	0.5664	1.23971	0.6752	0.9862
5	1	1	1	0.1208	0.1651	1.442	1.766	0.6113	0.5348	1.45397	0.6177	0.7579
6	1	1	1	0.187	0.089	1.44	1.764	0.4971	0.42337	1.319	0.4283	0.4897
X	1	1	1	0.187033	0.156675	1.44163	1.76585	0.53395	0.506775	1.31894	0.658183	0.800515

## Sheet: Comet tail length  
	Comet tail length (µm)
	Control			BPA			BPA + Astragaloside IV			BPA + Astragalus spinosus saponin
	Tail length
No. of rats	Prefrontal cortex	Hippocampus	Striatum	Prefrontal cortex	Hippocampus	Striatum	Prefrontal cortex	Hippocampus	Striatum	Prefrontal cortex	Hippocampus	Striatum
1	21	13	15	65	31	46	19	21	20	22	32	16
2	25	27	15	64	38	67	14	13	22	23	29	22
3	27	26	19	69	35	67	18	13	21	24	27	27
4	24	26	14	65	37	45	18	12	20	18	27	32
5	23	19	11	79	37	41	19	20	21	21	12	34
6	21	29	14	88	33	40	15	19	21	23	33	27
7	23	29	16	100	37	46	14	18	22	20	25	25
8	25	28	12	73	32	59	19	11	19	18	24	24
9	19	22	16	80	40	64	19	11	19	20	22	29
10	13	26	13	77	37	42	19	11	20	15	17	33
11	22	25	18	71	36	42	19	13	22	23	17	32
12	25	24	14	94	53	62	18	22	15	23	24	34
13	20	22	15	68	35	50	15	14	19	23	13	22
14	20	18	11	76	51	46	17	11	14	22	35	32
15	19	19	18	66	32	41	16	12	21	16	20	27
16	12	29	13	108	32	77	14	13	21	23	19	28
17	14	22	19	64	49	46	14	15	19	18	17	35
18	19	13	17	67	56	62	13	16	22	16	21	33
19	18	24	17	69	62	51	14	12	14	18	14	37
20	15	27	12	98	42	55	13	15	19	23	15	29
21	19	25	17	72	36	112	13	11	19	18	12	31
22	19	24	17	104	55	112	13	11	17	19	14	35
23	19	14	19	74	34	41	14	12	18	24	33	36
24	18	21	15	67	37	45	13	13	17	23	31	31
25	14	29	14	66	39	66	17	16	19	23	16	29
26	13	26	18	64	32	65	18	17	17	14	18	35
27	14	27	15	139	35	77	15	13	19	23	30	33
28	14	24	15	86	59	51	18	14	20	19	22	20
29	15	27	18	112	39	49	16	11	25	19	16	29
30	16	27	14	87	34	40	19	11	22	10	23	33
31	14	21	18	99	31	83	17	11	24	20	20	27
32	14	28	16	94	31	60	18	11	24	17	20	32
33	13	16	16	89	44	41	19	11	23	11	32	36
34	13	26	13	77	66	45	19	10	23	22	38	27
35	12	26	18	68	47	59	16	10	24	11	39	32
36	12	20	17	53	40	47	16	10	23	19	35	20
37	18	20	16	54	61	55	16	10	21	17	22	33
38	14	29	13	85	51	45	13	10	21	13	22	27
39	18	16	12	58	63	59	20	10	23	18	30	31
40	14	21	18	60	45	42	15	10	24	17	19	32
41	13	22	16	64	41	60	18	10	23	21	11	36
42	19	25	16	48	45	52	18	10	20	16	17	23
43	17	35	16	62	47	44	19	10	23	15	12	23
44	18	33	13	50	52	46	18	10	22	22	11	31
45	16	13	11	63	42	54	16	10	22	14	18	28
46	19	34	12	57	48	65	14	10	23	22	15	28
47	21	31	12	59	50	45	17	10	23	19	17	26
48	23	27	12	63	57	54	13	10	22	21	19	26
49	20	26	13	50	57	54	17	10	25	20	15	24
50	22	26	13	55	64	45	16	10	25	22	24	36
51	18	19	16	57	51	51	13	10	25	10	17	33
52	23	37	15	56	30	46	15	8	25	18	18	26
53	19	31	13	53	33	45	18	10	24	14	17	30
54	23	19	11	52	30	40	19	8	24	10	13	31
55	16	31	10	89	31	43	14	10	24	13	19	27
56	19	32	14	54	30	42	15	7	25	13	26	26
57	19	13	12	56	34	42	19	9	25	15	10	26
58	22	33	11	77	34	45	18	7	23	15	18	36
59	20	37	17	52	33	43	17	9	24	11	14	30
60	21	24	19	57	30	48	19	9	25	16	10	26
61	18	14	14	61	31	62	16	7	21	12	13	28
62	16	21	14	60	31	44	19	8	20	15	13	24
63	18	29	11	62	32	52	18	10	18	14	15	22
64	23	36	19	60	34	194	17	9	23	14	15	32
65	20	35	17	60	39	46	17	7	25	14	11	35
66	18	27	18	62	37	47	15	10	24	15	16	36
67	21	31	13	55	41	58	16	9	17	12	12	33
68	23	27	11	50	55	48	19	10	24	17	15	38
69	25	21	9	131	36	49	14	8	25	18	14	38
70	26	28	9	79	39	58	15	9	21	18	14	34
71	25	16	11	150	35	45	16	9	24	17	14	31
72	24	26	12	66	31	53	18	8	20	18	15	24
73	21	26	13	78	37	49	15	10	22	20	12	26
74	25	20	11	87	33	65	15	8	20	20	17	35
75	24	20	11	78	39	57	16	8	22	22	18	25
76	20	35	11	71	31	50	14	8	21	23	18	28
77	27	31	18	61	58	46	16	9	23	15	17	33
78	19	33	10	85	27	89	17	8	18	16	18	35
79	23	35	13	94	76	70	19	8	20	20	20	34
80	26	33	6	61	75	76	15	9	19	16	20	32
81	23	35	10	61	49	67	15	8	17	15	22	26
82	18	32	10	56	44	58	16	7	18	16	23	34
83	18	34	12	50	104	53	17	9	19	19	25	37
84	21	32	7	50	31	46	19	9	18	16	23	35
85	22	36	14	70	33	61	15	9	24	15	29	33
86	14	31	10	68	32	55	14	9	22	19	29	30
87	19	32	17	56	37	71	16	9	18	17	27	33
88	21	31	14	54	41	45	19	9	21	20	25	35
89	24	33	14	139	46	57	17	8	22	14	26	36
90	23	34	15	80	44	53	17	8	22	18	29	36
91	24	31	19	63	31	47	16	7	22	13	26	28
92	24	37	17	63	50	77	17	9	23	20	31	34
93	22	30	14	72	57	57	14	9	21	16	25	27
94	16	31	16	74	29	99	17	9	20	17	33	23
95	21	32	16	48	29	52	19	8	19	14	32	34
96	25	29	16	48	29	47	19	7	23	12	30	31
97	22	37	15	51	29	57	17	7	24	15	29	26
98	22	36	14	49	29	49	16	9	20	18	27	35
99	18	33	19	47	28	51	15	8	21	18	27	32
100	22	30	11	49	29	47	14	8	24	17	27	34
X	19.57	26.9697	14.21	70.82	41.41	56.14	16.41	10.49	21.31	17.58	21.08	30.21

[truncated: 4 more sheets: Comet tail moment  , Comet tailing ratio  , ER-color intensity, ER-count]
